# Supplementary material for: Opioid Prescribing to Adolescents in the United States From 2005 to 2016
Source: Atypon-hosted journal article supplement (doi:10.1176/appi.ps.201700562), 2018-07-09
Supplement: appi.ps.201700562.ds001.pdf [file appi.ps.201700562.ds001.pdf]

**Online Supplement**

**Appendix. Figure A1. Percent of Adolescent Opioid Prescription Days' Supply – Commercial**

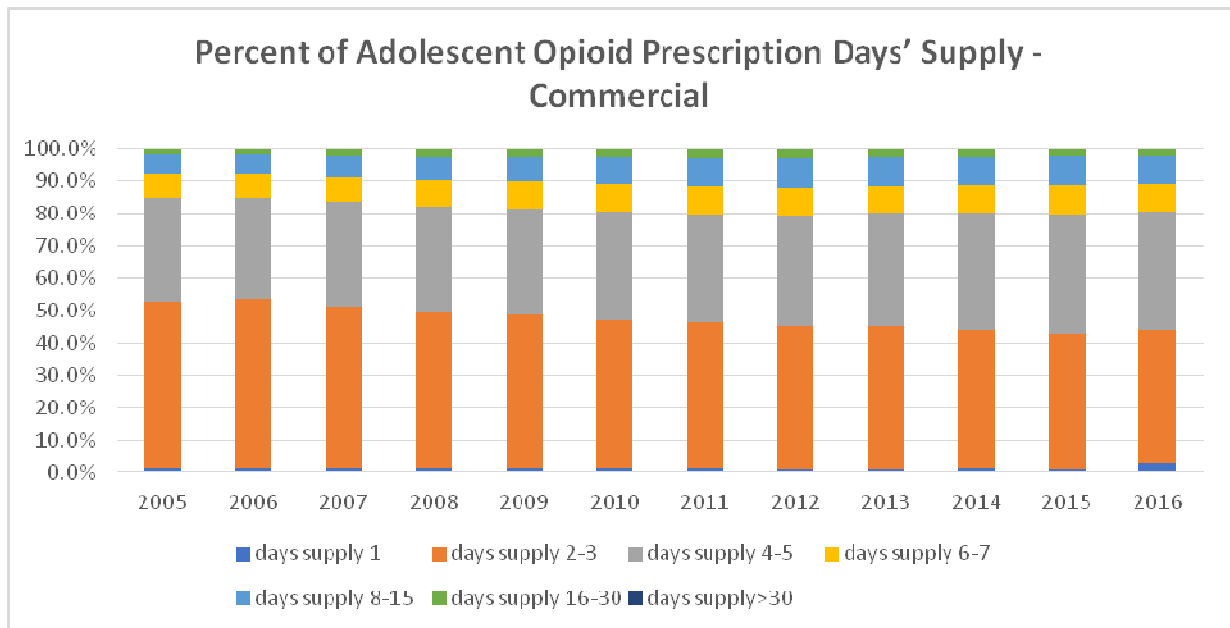

**Appendix Table A1. Confidence Intervals and Statistical Tests Corresponding with Percent of Adolescent Opioid Prescription Days' Supply – Medicaid**

| Category           | Year  |       | Statistics |               |
|--------------------|-------|-------|------------|---------------|
|                    | 2005  | 2016  | p value    | 95% CI        |
| Days' supply 1     | 1.6%  | 3.6%  | <0.000     | 1.93-2.15     |
| Days' supply 2-3   | 50.5% | 36.7% | <0.000     | -14.1 - -13.4 |
| Days' supply 4-5   | 30.2% | 37.7% | <0.000     | 7.1-7.73      |
| Days' supply 6-7   | 8.0%  | 8.5%  | <0.000     | 0.31-0.68     |
| Days' supply 8-15  | 7.0%  | 10.6% | <0.000     | 3.33-3.72     |
| Days' supply 16-30 | 2.6%  | 3.0%  | <0.000     | 0.28-0.51     |
| Days' supply>30    | 0.1%  | 0.0%  | <0.000     | -0.08 - -0.06 |

**Appendix Table A2. Confidence Intervals and Statistical Tests Corresponding with Percent of Adolescent Opioid Prescription Days' Supply – Commercial**

| Category           | Year  |       | Statistics |               |
|--------------------|-------|-------|------------|---------------|
|                    | 2005  | 2016  | p value    | 95% CI        |
| Days' supply 1     | 1.1%  | 2.5%  | <0.000     | 1.31-1.51     |
| Days' supply 2-3   | 51.9% | 41.6% | <0.000     | -10.6 - -9.89 |
| Days' supply 4-5   | 31.8% | 36.6% | <0.000     | 4.41-5.13     |
| Days' supply 6-7   | 7.4%  | 8.5%  | <0.000     | 0.90-1.31     |
| Days' supply 8-15  | 6.1%  | 8.9%  | <0.000     | 2.54-2.94     |
| Days' supply 16-30 | 1.6%  | 1.9%  | <0.000     | 0.17-0.37     |
| Days' supply>30    | 0.05% | 0.02% | <0.000     | -0.04 - -0.02 |
